# Supplementary material for: Health status of honey bee colonies (Apis mellifera) and disease-related risk factors for colony losses in Austria
Source: PubMed Central journal article supplement (PMC6615611; doi:10.1371/journal.pone.0219293), 2019-07-09
Supplement: pone.0219293.s002.pdf [file pone.0219293.s002.pdf]

# 1. Bienenstandbesuch, Juli 2015

[Bienenstand Nr: W\_03]

**PROBENNEHMER: Köglberger**

**Datum\*:** .....

Mit Sternchen\* gekennzeichnete Felder müssen unbedingt ausgefüllt werden!

## Generelle Information zum Imkereibetrieb und zum Bienenstand:

### 1/ ImkerIn

Hans Imkermeister  
 Honigstraße 52a  
 1234 Bienenfeld

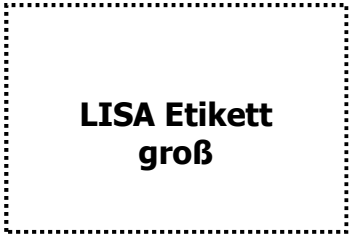

Tel: .....

E-Mail: .....

**Gesamtzahl aller Bienenstände des Betriebs zum heutigen Datum\*:** .....

**Gesamtzahl aller Bienenvölker des Betriebs zum heutigen Datum\*:** .....

**Ist der Betrieb ein zertifizierter Biobetrieb?\***     ja                       nein

### Betriebsziel des Imkereibetriebes? (Mehrfachnennung möglich)

Honigproduktion     Jungvolkproduktion     Königinnenproduktion

**ImkerIn seit dem Jahr:** .....

Ausbildungen:     keine                       Grundkurs                       Aufbaukurse  
                           FacharbeiterIn                       ImkermeisterIn                       WanderlehrerIn

Interesse an Fortbildungen:                       ja                       nein

Wie häufig verwenden Sie folgende Informationsquellen zu Fortbildungszwecken?

|                           | mind. einmal pro Monat   | mehrmals jährlich        | einmal im Jahr           | alle paar Jahre          | nie                      |
|---------------------------|--------------------------|--------------------------|--------------------------|--------------------------|--------------------------|
| Kurse, Schulungen         | <input type="checkbox"/> | <input type="checkbox"/> | <input type="checkbox"/> | <input type="checkbox"/> | <input type="checkbox"/> |
| Vorträge, Imkereitagungen | <input type="checkbox"/> | <input type="checkbox"/> | <input type="checkbox"/> | <input type="checkbox"/> | <input type="checkbox"/> |
| Vereinsabende             | <input type="checkbox"/> | <input type="checkbox"/> | <input type="checkbox"/> | <input type="checkbox"/> | <input type="checkbox"/> |
| Imkerzeitschriften        | <input type="checkbox"/> | <input type="checkbox"/> | <input type="checkbox"/> | <input type="checkbox"/> | <input type="checkbox"/> |
| Internet, Imkerforen      | <input type="checkbox"/> | <input type="checkbox"/> | <input type="checkbox"/> | <input type="checkbox"/> | <input type="checkbox"/> |

## 2/ Besucher Bienenstand

**Standort:** PLZ\*: ..... Standgemeinde\*: .....

Katastralgemeinde\*: .....

GPS (6 dezimale):

Breitengrad\*: ..... - Längengrad\*: ..... (z.B.: 43.612454 -7.054878)

Seehöhe\*: .....

**Welche Art der Landnutzung gibt es im 3km-Umkreis des Bienenstandes (ungefähre Schätzung)?**

- Ackerflächen: .....Prozent
- Wiesenflächen: .....Prozent
- Waldflächen: .....Prozent
- Siedlungsräume: .....Prozent

Sind Sie mit den Völkern dieses Bienenstandes in dieser Saison gewandert?  Ja  Nein

**Wenn Ja;** Wanderungen 2015:

| Tracht | Land/Bundesland | Datum Anwanderung | Datum Abwanderung |
|--------|-----------------|-------------------|-------------------|
|        |                 |                   |                   |
|        |                 |                   |                   |
|        |                 |                   |                   |
|        |                 |                   |                   |
|        |                 |                   |                   |

## 3/ Risiko-Faktor für die Einschleppung exotischer Tiere

**Wurden seit Anfang 2013 Königinnen für diese Imkerei nach Österreich importiert?**

Ja  Nein

Falls ja, Angabe des oder der Herkunftsländer: .....

**Wurden seit Anfang 2013 Bienenvölker, Schwärme oder Paketbienen für diese Imkerei nach Österreich importiert?**

Ja  Nein

Falls ja, Angabe des oder der Herkunftsländer: .....

## 4/ Völkerbestandsentwicklung in der Saison 2014/2015

**a) Überwinterung an diesem Bienenstand**

- Anzahl eingewinterter Völker 2014\*: .....
- Anzahl ausgewinterter Völker 2015\*: .....

**b) Zu diesem Bienenstand 2015 bisher hinzugekommene Völker\*:** .....(insg.)

- Davon zugekauft oder von anderem eigenen Stand verbracht\*:  
(falls nicht aus Österreich, Herkunftsland: .....)
- Davon Ableger\*:
- Davon natürliche Schwärme und Kehrschwärme\*:

**c) Aus diesem Bienenstand seit der Auswinterung 2015 weggefallene Völker\*:** .....(insg.)

- Davon verkauft oder an einen anderen Stand gebracht\*:
- Davon weggefallen durch Vereinigung mit einem anderen Stock\*:
- Davon gestorben\*:

**d) In diesem Bienenstand 2015 neu eingesetzte Königinnen\*:** ..... (insg.)

- Davon gekauft\*:  
(falls nicht aus Österreich, Herkunftsland: .....)
- Davon selbst produziert\*:

**5/ Angaben zu allen vorgenommenen medikamentösen Behandlungen an diesem Stand\***

*Bitte führen Sie – wenn möglich – alle in den letzten 12 Monaten vorgenommenen Behandlungen auf. Angaben so genau wie möglich!*

| Produktname od. Wirkstoff (inklusive Konzentration) | Dosierung pro Volk | Applikationsart | Datum der Behandlungen | Dauer der Behandlung |
|-----------------------------------------------------|--------------------|-----------------|------------------------|----------------------|
|                                                     |                    |                 |                        |                      |
|                                                     |                    |                 |                        |                      |
|                                                     |                    |                 |                        |                      |
|                                                     |                    |                 |                        |                      |
|                                                     |                    |                 |                        |                      |
|                                                     |                    |                 |                        |                      |
|                                                     |                    |                 |                        |                      |
|                                                     |                    |                 |                        |                      |
|                                                     |                    |                 |                        |                      |
|                                                     |                    |                 |                        |                      |

**6/ Angaben zu allen vorgenommenen biotechnische und anderen Methoden an diesem Stand\***

*Bitte führen Sie – wenn möglich – alle in den letzten 12 Monaten vorgenommenen Behandlungen auf. Angaben so genau wie möglich!*

| Art der Behandlung                      | durchgeführt                                                            | Datum der Behandlung |  |  |  |  |
|-----------------------------------------|-------------------------------------------------------------------------|----------------------|--|--|--|--|
| <b>Drohnenbrutentnahme</b>              | <input type="checkbox"/> Ja <input type="checkbox"/> Nein               |                      |  |  |  |  |
| <b>Wärmebehandlung – gesamter Stock</b> | <input type="checkbox"/> Ja <input type="checkbox"/> Nein<br>Gerät..... |                      |  |  |  |  |
| <b>Wärmebehandlung – Brutwaben</b>      | <input type="checkbox"/> Ja <input type="checkbox"/> Nein<br>Gerät..... |                      |  |  |  |  |
| <b>Gesamtbrutentnahme</b>               | <input type="checkbox"/> Ja <input type="checkbox"/> Nein               |                      |  |  |  |  |
| <b>Brutunterbrechung</b>                | <input type="checkbox"/> Ja <input type="checkbox"/> Nein               |                      |  |  |  |  |
| <b>Bannwabenverfahren</b>               | <input type="checkbox"/> Ja <input type="checkbox"/> Nein               |                      |  |  |  |  |
|                                         |                                                                         |                      |  |  |  |  |
|                                         |                                                                         |                      |  |  |  |  |
|                                         |                                                                         |                      |  |  |  |  |
|                                         |                                                                         |                      |  |  |  |  |
|                                         |                                                                         |                      |  |  |  |  |
|                                         |                                                                         |                      |  |  |  |  |

## 7/ Winterverluste 2014 / 2015

*Dieser Abschnitt behandelt die Winterverluste **ALLER Völker des Imkerbetriebs** und ist nicht nur auf den beprobten Stand bezogen.*

*Die Fragen stammen von der Internetplattform „bienenstand.at“ der Universität Graz, die auch ein Teil des Projekts „Zukunft Biene“ darstellt. Sie sollen auch beantwortet werden, wenn der Imker / die Imkerin schon an der Umfrage der Universität Graz teilgenommen hat.*

**Hat sich der Imker / die Imkerin an der Erhebung der Winterverluste 2014/2015 der Uni Graz beteiligt (Bienenstand.at)?\***  Ja  Nein

**In welchem Bezirk stehen die Bienenvölker?\***

im Bezirk:.....

in mehreren Bezirken

**Wo befindet sich der (Haupt-)Bienenstand (Winterstandort)? Bitte Gemeinde und PLZ des Standortes nennen.\***

Gemeinde.....; PLZ: .....

**An wie vielen verschiedenen Standorten (Anzahl) werden Bienen gehalten?\*** .....

**Werden alle Bienen innerhalb von etwa 15 km des genannten Standortes gehalten?\***

Ja  Unsicher  Nein

**Wie viele Bienenvölker wurden 2014 auf allen Ständen eingewintert?\*** .....

**Wie viele dieser Völker gingen im Winter 2014/2015 auf allen Ständen verloren?\***

- Tote oder verlorene (leere) Völker? .....
- Durch Königinnenprobleme .....

**Basisdaten zu und Beobachtungen an den Fokus-Völkern**

**BITTE ENTSPRECHEND AUSFÜLLEN**

| A) BESCHREIBUNG DES VOLKES *                               | Nummern der Fokus-Völker |   |   |   |   |   |   |   |   |    |    |    |
|------------------------------------------------------------|--------------------------|---|---|---|---|---|---|---|---|----|----|----|
|                                                            | 1                        | 2 | 3 | 4 | 5 | 6 | 7 | 8 | 9 | 10 | 11 | 12 |
| Königin stammt aus dem Jahr...                             |                          |   |   |   |   |   |   |   |   |    |    |    |
| Wirtschaftsvolk (WV) oder Jungvolk (JV)                    |                          |   |   |   |   |   |   |   |   |    |    |    |
| Jungvolk: Kehrschwarm (KS) oder Ableger (A)                |                          |   |   |   |   |   |   |   |   |    |    |    |
| Volk in diesem Jahr gewandert: ja (J) oder nein (N)        |                          |   |   |   |   |   |   |   |   |    |    |    |
| Wabenmaß (wenn unterschiedlich: Brutraum + Honigraum)      |                          |   |   |   |   |   |   |   |   |    |    |    |
| Anzahl Zargen                                              |                          |   |   |   |   |   |   |   |   |    |    |    |
| Anzahl Waben pro Zarge                                     |                          |   |   |   |   |   |   |   |   |    |    |    |
| Volksstärke<br>(1: sehr schwach; 2: normal; 3: sehr stark) |                          |   |   |   |   |   |   |   |   |    |    |    |

**BITTE ZUTREFFENDES ANKREUZEN:**

| B.1) BEOBACHTETE SYMPTOME VOR ÖFFNEN*         | 1                        | 2                        | 3                        | 4                        | 5                        | 6                        | 7                        | 8                        | 9                        | 10                       | 11                       | 12                       |
|-----------------------------------------------|--------------------------|--------------------------|--------------------------|--------------------------|--------------------------|--------------------------|--------------------------|--------------------------|--------------------------|--------------------------|--------------------------|--------------------------|
| Tote Bienen vor dem Bienenvolk                | <input type="checkbox"/> | <input type="checkbox"/> | <input type="checkbox"/> | <input type="checkbox"/> | <input type="checkbox"/> | <input type="checkbox"/> | <input type="checkbox"/> | <input type="checkbox"/> | <input type="checkbox"/> | <input type="checkbox"/> | <input type="checkbox"/> | <input type="checkbox"/> |
| Lebende, flugunfähige Bienen am Boden         | <input type="checkbox"/> | <input type="checkbox"/> | <input type="checkbox"/> | <input type="checkbox"/> | <input type="checkbox"/> | <input type="checkbox"/> | <input type="checkbox"/> | <input type="checkbox"/> | <input type="checkbox"/> | <input type="checkbox"/> | <input type="checkbox"/> | <input type="checkbox"/> |
| Kot / Kotflecken                              | <input type="checkbox"/> | <input type="checkbox"/> | <input type="checkbox"/> | <input type="checkbox"/> | <input type="checkbox"/> | <input type="checkbox"/> | <input type="checkbox"/> | <input type="checkbox"/> | <input type="checkbox"/> | <input type="checkbox"/> | <input type="checkbox"/> | <input type="checkbox"/> |
| Zitternde Bienen                              | <input type="checkbox"/> | <input type="checkbox"/> | <input type="checkbox"/> | <input type="checkbox"/> | <input type="checkbox"/> | <input type="checkbox"/> | <input type="checkbox"/> | <input type="checkbox"/> | <input type="checkbox"/> | <input type="checkbox"/> | <input type="checkbox"/> | <input type="checkbox"/> |
| Schwarz-glänzende Bienen                      | <input type="checkbox"/> | <input type="checkbox"/> | <input type="checkbox"/> | <input type="checkbox"/> | <input type="checkbox"/> | <input type="checkbox"/> | <input type="checkbox"/> | <input type="checkbox"/> | <input type="checkbox"/> | <input type="checkbox"/> | <input type="checkbox"/> | <input type="checkbox"/> |
| Zurückgewiesene Bienen                        | <input type="checkbox"/> | <input type="checkbox"/> | <input type="checkbox"/> | <input type="checkbox"/> | <input type="checkbox"/> | <input type="checkbox"/> | <input type="checkbox"/> | <input type="checkbox"/> | <input type="checkbox"/> | <input type="checkbox"/> | <input type="checkbox"/> | <input type="checkbox"/> |
| Ausgetragene Brut                             | <input type="checkbox"/> | <input type="checkbox"/> | <input type="checkbox"/> | <input type="checkbox"/> | <input type="checkbox"/> | <input type="checkbox"/> | <input type="checkbox"/> | <input type="checkbox"/> | <input type="checkbox"/> | <input type="checkbox"/> | <input type="checkbox"/> | <input type="checkbox"/> |
| Verstopftes Flugloch                          | <input type="checkbox"/> | <input type="checkbox"/> | <input type="checkbox"/> | <input type="checkbox"/> | <input type="checkbox"/> | <input type="checkbox"/> | <input type="checkbox"/> | <input type="checkbox"/> | <input type="checkbox"/> | <input type="checkbox"/> | <input type="checkbox"/> | <input type="checkbox"/> |
| Anderes (Fußnote setzen u. unten beschreiben) |                          |                          |                          |                          |                          |                          |                          |                          |                          |                          |                          |                          |

Bitte beschreiben Sie außergewöhnliche Beobachtungen und Symptome (eventuell mit Fußnotenbezug):

z. B.: Verwendung von Hinterbehandlern, tote Völker am Stand,...

Abkürzungen Wabenmaß:  
 Z ..... Zander  
 ZF ..... Zander flach  
 DN = EM ..... Deutschnormal, Einheitsmaß  
 BW ..... Breitwabe  
 D ..... Dadant  
 Wenn anderes Maß verwendet, Abkürzung hier vermerken:

**Basisdaten zu und Beobachtungen an den Fokus-Völkern**

**BITTE ZUTREFFENDES ANKREUZEN:**

| <b>B.2) BEOBACHTETE SYMPTOME IM VOLK*</b>    | <b>1</b>                 | <b>2</b>                 | <b>3</b>                 | <b>4</b>                 | <b>5</b>                 | <b>6</b>                 | <b>7</b>                 | <b>8</b>                 | <b>9</b>                 | <b>10</b>                | <b>11</b>                | <b>12</b>                |
|----------------------------------------------|--------------------------|--------------------------|--------------------------|--------------------------|--------------------------|--------------------------|--------------------------|--------------------------|--------------------------|--------------------------|--------------------------|--------------------------|
| Lückiges Brutbild                            | <input type="checkbox"/> | <input type="checkbox"/> | <input type="checkbox"/> | <input type="checkbox"/> | <input type="checkbox"/> | <input type="checkbox"/> | <input type="checkbox"/> | <input type="checkbox"/> | <input type="checkbox"/> | <input type="checkbox"/> | <input type="checkbox"/> | <input type="checkbox"/> |
| Löchrige Zelldeckel                          | <input type="checkbox"/> | <input type="checkbox"/> | <input type="checkbox"/> | <input type="checkbox"/> | <input type="checkbox"/> | <input type="checkbox"/> | <input type="checkbox"/> | <input type="checkbox"/> | <input type="checkbox"/> | <input type="checkbox"/> | <input type="checkbox"/> | <input type="checkbox"/> |
| Eingesunkene Deckel / abweichende Färbung    | <input type="checkbox"/> | <input type="checkbox"/> | <input type="checkbox"/> | <input type="checkbox"/> | <input type="checkbox"/> | <input type="checkbox"/> | <input type="checkbox"/> | <input type="checkbox"/> | <input type="checkbox"/> | <input type="checkbox"/> | <input type="checkbox"/> | <input type="checkbox"/> |
| Zusammengesunkene Larven                     | <input type="checkbox"/> | <input type="checkbox"/> | <input type="checkbox"/> | <input type="checkbox"/> | <input type="checkbox"/> | <input type="checkbox"/> | <input type="checkbox"/> | <input type="checkbox"/> | <input type="checkbox"/> | <input type="checkbox"/> | <input type="checkbox"/> | <input type="checkbox"/> |
| Verfärbte Larven / Puppen                    | <input type="checkbox"/> | <input type="checkbox"/> | <input type="checkbox"/> | <input type="checkbox"/> | <input type="checkbox"/> | <input type="checkbox"/> | <input type="checkbox"/> | <input type="checkbox"/> | <input type="checkbox"/> | <input type="checkbox"/> | <input type="checkbox"/> | <input type="checkbox"/> |
| Abgestorbene Brut                            | <input type="checkbox"/> | <input type="checkbox"/> | <input type="checkbox"/> | <input type="checkbox"/> | <input type="checkbox"/> | <input type="checkbox"/> | <input type="checkbox"/> | <input type="checkbox"/> | <input type="checkbox"/> | <input type="checkbox"/> | <input type="checkbox"/> | <input type="checkbox"/> |
| Typischer AFB Geruch                         | <input type="checkbox"/> | <input type="checkbox"/> | <input type="checkbox"/> | <input type="checkbox"/> | <input type="checkbox"/> | <input type="checkbox"/> | <input type="checkbox"/> | <input type="checkbox"/> | <input type="checkbox"/> | <input type="checkbox"/> | <input type="checkbox"/> | <input type="checkbox"/> |
| Fadenziehende Masse                          | <input type="checkbox"/> | <input type="checkbox"/> | <input type="checkbox"/> | <input type="checkbox"/> | <input type="checkbox"/> | <input type="checkbox"/> | <input type="checkbox"/> | <input type="checkbox"/> | <input type="checkbox"/> | <input type="checkbox"/> | <input type="checkbox"/> | <input type="checkbox"/> |
| Schorfe                                      | <input type="checkbox"/> | <input type="checkbox"/> | <input type="checkbox"/> | <input type="checkbox"/> | <input type="checkbox"/> | <input type="checkbox"/> | <input type="checkbox"/> | <input type="checkbox"/> | <input type="checkbox"/> | <input type="checkbox"/> | <input type="checkbox"/> | <input type="checkbox"/> |
| Sackbrutsymptome (Säckchen, Schiffchen)      | <input type="checkbox"/> | <input type="checkbox"/> | <input type="checkbox"/> | <input type="checkbox"/> | <input type="checkbox"/> | <input type="checkbox"/> | <input type="checkbox"/> | <input type="checkbox"/> | <input type="checkbox"/> | <input type="checkbox"/> | <input type="checkbox"/> | <input type="checkbox"/> |
| Kalkbrutmumien                               | <input type="checkbox"/> | <input type="checkbox"/> | <input type="checkbox"/> | <input type="checkbox"/> | <input type="checkbox"/> | <input type="checkbox"/> | <input type="checkbox"/> | <input type="checkbox"/> | <input type="checkbox"/> | <input type="checkbox"/> | <input type="checkbox"/> | <input type="checkbox"/> |
| Deformierte Flügel                           | <input type="checkbox"/> | <input type="checkbox"/> | <input type="checkbox"/> | <input type="checkbox"/> | <input type="checkbox"/> | <input type="checkbox"/> | <input type="checkbox"/> | <input type="checkbox"/> | <input type="checkbox"/> | <input type="checkbox"/> | <input type="checkbox"/> | <input type="checkbox"/> |
| Varroamilben auf Bienen                      | <input type="checkbox"/> | <input type="checkbox"/> | <input type="checkbox"/> | <input type="checkbox"/> | <input type="checkbox"/> | <input type="checkbox"/> | <input type="checkbox"/> | <input type="checkbox"/> | <input type="checkbox"/> | <input type="checkbox"/> | <input type="checkbox"/> | <input type="checkbox"/> |
| Varroamilben in Zelldeckeln                  | <input type="checkbox"/> | <input type="checkbox"/> | <input type="checkbox"/> | <input type="checkbox"/> | <input type="checkbox"/> | <input type="checkbox"/> | <input type="checkbox"/> | <input type="checkbox"/> | <input type="checkbox"/> | <input type="checkbox"/> | <input type="checkbox"/> | <input type="checkbox"/> |
| Verdächtige Milben (außer Varroa)            | <input type="checkbox"/> | <input type="checkbox"/> | <input type="checkbox"/> | <input type="checkbox"/> | <input type="checkbox"/> | <input type="checkbox"/> | <input type="checkbox"/> | <input type="checkbox"/> | <input type="checkbox"/> | <input type="checkbox"/> | <input type="checkbox"/> | <input type="checkbox"/> |
| Verdächtige Eier / Larven / Käfer            | <input type="checkbox"/> | <input type="checkbox"/> | <input type="checkbox"/> | <input type="checkbox"/> | <input type="checkbox"/> | <input type="checkbox"/> | <input type="checkbox"/> | <input type="checkbox"/> | <input type="checkbox"/> | <input type="checkbox"/> | <input type="checkbox"/> | <input type="checkbox"/> |
| Anderes (Fußnote setzen + unten beschreiben) | <input type="checkbox"/> | <input type="checkbox"/> | <input type="checkbox"/> | <input type="checkbox"/> | <input type="checkbox"/> | <input type="checkbox"/> | <input type="checkbox"/> | <input type="checkbox"/> | <input type="checkbox"/> | <input type="checkbox"/> | <input type="checkbox"/> | <input type="checkbox"/> |

| <b>C) VERDACHT AUF*</b>                                 | <b>1</b>                 | <b>2</b>                 | <b>3</b>                 | <b>4</b>                 | <b>5</b>                 | <b>6</b>                 | <b>7</b>                 | <b>8</b>                 | <b>9</b>                 | <b>10</b>                | <b>11</b>                | <b>12</b>                |
|---------------------------------------------------------|--------------------------|--------------------------|--------------------------|--------------------------|--------------------------|--------------------------|--------------------------|--------------------------|--------------------------|--------------------------|--------------------------|--------------------------|
| Varroose                                                | <input type="checkbox"/> | <input type="checkbox"/> | <input type="checkbox"/> | <input type="checkbox"/> | <input type="checkbox"/> | <input type="checkbox"/> | <input type="checkbox"/> | <input type="checkbox"/> | <input type="checkbox"/> | <input type="checkbox"/> | <input type="checkbox"/> | <input type="checkbox"/> |
| Amerikanische Faulbrut (Verdachtsproben nehmen!)        | <input type="checkbox"/> | <input type="checkbox"/> | <input type="checkbox"/> | <input type="checkbox"/> | <input type="checkbox"/> | <input type="checkbox"/> | <input type="checkbox"/> | <input type="checkbox"/> | <input type="checkbox"/> | <input type="checkbox"/> | <input type="checkbox"/> | <input type="checkbox"/> |
| Europäische Faulbrut (Verdachtsproben nehmen!)          | <input type="checkbox"/> | <input type="checkbox"/> | <input type="checkbox"/> | <input type="checkbox"/> | <input type="checkbox"/> | <input type="checkbox"/> | <input type="checkbox"/> | <input type="checkbox"/> | <input type="checkbox"/> | <input type="checkbox"/> | <input type="checkbox"/> | <input type="checkbox"/> |
| Sackbrut                                                | <input type="checkbox"/> | <input type="checkbox"/> | <input type="checkbox"/> | <input type="checkbox"/> | <input type="checkbox"/> | <input type="checkbox"/> | <input type="checkbox"/> | <input type="checkbox"/> | <input type="checkbox"/> | <input type="checkbox"/> | <input type="checkbox"/> | <input type="checkbox"/> |
| Kalkbrut                                                | <input type="checkbox"/> | <input type="checkbox"/> | <input type="checkbox"/> | <input type="checkbox"/> | <input type="checkbox"/> | <input type="checkbox"/> | <input type="checkbox"/> | <input type="checkbox"/> | <input type="checkbox"/> | <input type="checkbox"/> | <input type="checkbox"/> | <input type="checkbox"/> |
| Nosemose (Verdachtsproben nehmen!)                      | <input type="checkbox"/> | <input type="checkbox"/> | <input type="checkbox"/> | <input type="checkbox"/> | <input type="checkbox"/> | <input type="checkbox"/> | <input type="checkbox"/> | <input type="checkbox"/> | <input type="checkbox"/> | <input type="checkbox"/> | <input type="checkbox"/> | <input type="checkbox"/> |
| Chronische Bienenparalyse (Verdachtsproben nehmen!)     | <input type="checkbox"/> | <input type="checkbox"/> | <input type="checkbox"/> | <input type="checkbox"/> | <input type="checkbox"/> | <input type="checkbox"/> | <input type="checkbox"/> | <input type="checkbox"/> | <input type="checkbox"/> | <input type="checkbox"/> | <input type="checkbox"/> | <input type="checkbox"/> |
| Flügeldeformationsvirus (DWV) (Verdachtsproben nehmen!) | <input type="checkbox"/> | <input type="checkbox"/> | <input type="checkbox"/> | <input type="checkbox"/> | <input type="checkbox"/> | <input type="checkbox"/> | <input type="checkbox"/> | <input type="checkbox"/> | <input type="checkbox"/> | <input type="checkbox"/> | <input type="checkbox"/> | <input type="checkbox"/> |
| Kleiner Beutenkäfer (Verdachtsproben nehmen!)           | <input type="checkbox"/> | <input type="checkbox"/> | <input type="checkbox"/> | <input type="checkbox"/> | <input type="checkbox"/> | <input type="checkbox"/> | <input type="checkbox"/> | <input type="checkbox"/> | <input type="checkbox"/> | <input type="checkbox"/> | <input type="checkbox"/> | <input type="checkbox"/> |
| Tropilaelaps-Milben (Verdachtsproben nehmen!)           | <input type="checkbox"/> | <input type="checkbox"/> | <input type="checkbox"/> | <input type="checkbox"/> | <input type="checkbox"/> | <input type="checkbox"/> | <input type="checkbox"/> | <input type="checkbox"/> | <input type="checkbox"/> | <input type="checkbox"/> | <input type="checkbox"/> | <input type="checkbox"/> |
| Anderes (Fußnote setzen u. unten beschreiben)           | <input type="checkbox"/> | <input type="checkbox"/> | <input type="checkbox"/> | <input type="checkbox"/> | <input type="checkbox"/> | <input type="checkbox"/> | <input type="checkbox"/> | <input type="checkbox"/> | <input type="checkbox"/> | <input type="checkbox"/> | <input type="checkbox"/> | <input type="checkbox"/> |
| <b>Totes Bienenvolk (nur bei Besuch 2 und 3)</b>        | <input type="checkbox"/> | <input type="checkbox"/> | <input type="checkbox"/> | <input type="checkbox"/> | <input type="checkbox"/> | <input type="checkbox"/> | <input type="checkbox"/> | <input type="checkbox"/> | <input type="checkbox"/> | <input type="checkbox"/> | <input type="checkbox"/> | <input type="checkbox"/> |

Bitte beschreiben Sie außergewöhnliche Symptome oder Krankheiten (mit Fußnotenbezug):

### Liste der genommenen Proben

| PROBENNAHME*                                                                                                                 | Nummer der Fokus-Völker |   |   |   |   |   |   |
|------------------------------------------------------------------------------------------------------------------------------|-------------------------|---|---|---|---|---|---|
|                                                                                                                              | 1                       | 2 | 3 | 4 | 5 | 6 | 7 |
| <b>Pflichtproben – Probennummer (letzte 3 Stellen der Etikettennummer) eintragen</b>                                         |                         |   |   |   |   |   |   |
| Bienenprobe Varroa<br>großer Becher<br><b>Bei Besuch 1 und 2</b>                                                             |                         |   |   |   |   |   |   |
| Bienenprobe PostHoc<br>Kleiner Becher<br><b>Bei allen Besuchen</b>                                                           |                         |   |   |   |   |   |   |
| Bienenbrot-Probe<br><b>Bei allen Besuchen</b>                                                                                |                         |   |   |   |   |   |   |
| <b>Verdachtsproben – passendes LISA-Etikett aufkleben oder Probennummer (letzte 3 Stellen der Etikettennummer) eintragen</b> |                         |   |   |   |   |   |   |
| Bienen –<br>außerhalb gesammelt                                                                                              |                         |   |   |   |   |   |   |
| Bienen –<br>innerhalb gesammelt                                                                                              |                         |   |   |   |   |   |   |
| Verdächtige Brutwabe                                                                                                         |                         |   |   |   |   |   |   |
| Verdächtige Milben                                                                                                           |                         |   |   |   |   |   |   |
| Verdächtige Käfer / Käferlarven                                                                                              |                         |   |   |   |   |   |   |
| Anderes (bitte beschreiben)                                                                                                  |                         |   |   |   |   |   |   |



**Liste der genommenen Proben**

| PROBENNAHME*                                                                                                                 | Nummer der Fokus-Völker |   |    |    |    |    |    |
|------------------------------------------------------------------------------------------------------------------------------|-------------------------|---|----|----|----|----|----|
|                                                                                                                              | 8                       | 9 | 10 | 11 | 12 | 13 | 14 |
| <b>Pflichtproben – Probennummer (letzte 3 Stellen der Etikettennummer) eintragen</b>                                         |                         |   |    |    |    |    |    |
| Bienenprobe Varroa<br>großer Becher<br><b>Bei Besuch 1 und 2</b>                                                             |                         |   |    |    |    |    |    |
| Bienenprobe PostHoc<br>Kleiner Becher<br><b>Bei allen Besuchen</b>                                                           |                         |   |    |    |    |    |    |
| Bienenbrot-Probe<br><b>Bei allen Besuchen</b>                                                                                |                         |   |    |    |    |    |    |
| <b>Verdachtsproben – passendes LISA-Etikett aufkleben oder Probennummer (letzte 3 Stellen der Etikettennummer) eintragen</b> |                         |   |    |    |    |    |    |
| Bienen –<br>außerhalb gesammelt                                                                                              |                         |   |    |    |    |    |    |
| Bienen –<br>innerhalb gesammelt                                                                                              |                         |   |    |    |    |    |    |
| Verdächtige Brutwabe                                                                                                         |                         |   |    |    |    |    |    |
| Verdächtige Milben                                                                                                           |                         |   |    |    |    |    |    |
| Verdächtige Käfer / Käferlarven                                                                                              |                         |   |    |    |    |    |    |
| Anderes (bitte beschreiben)                                                                                                  |                         |   |    |    |    |    |    |
