# Supplementary material for: Health status of honey bee colonies (Apis mellifera) and disease-related risk factors for colony losses in Austria
Source: PubMed Central journal article supplement (PMC6615611; doi:10.1371/journal.pone.0219293), 2019-07-09
Supplement: pone.0219293.s003.pdf [file pone.0219293.s003.pdf]

# 1<sup>st</sup> Visit, July 2015

[Apiary ID: W\_03]

Surveillance inspector: [Surname]

Date\*: .....

\* mandatory fields!

## General information about the beekeeping operation (=bk operation) and the visited apiary:

### 1/ Beekeeper

Hans Imkermeister  
 Honigstraße 52a  
 1234 Bienenfeld

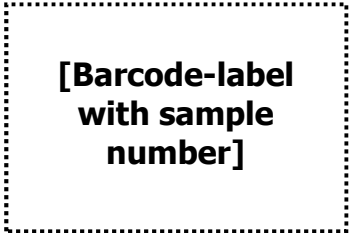

Phone: .....

E-Mail: .....

Total number of all apiaries of the bk operation at the current date\*: .....

Total number of all bee colonies of the bk operation at the current date\*: .....

Is the operation certified as 'organic' bk-operation?\*  yes  no

### Business objective of the bk operation? (multiple answers possible)

- honey  package bees  queens

Beekeeper since the year: .....

- Beekeeping education:  none  beginner's course  advanced courses  
 skilled worker  beekeeping master  beekeeping instructor

Interest in further training:  yes  no

How often do you use the following information sources for advanced education?

|                           | At least once a month    | Several times a year     | Once a year              | Every few years          | never                    |
|---------------------------|--------------------------|--------------------------|--------------------------|--------------------------|--------------------------|
| Courses, educations       | <input type="checkbox"/> | <input type="checkbox"/> | <input type="checkbox"/> | <input type="checkbox"/> | <input type="checkbox"/> |
| Talks, conferences        | <input type="checkbox"/> | <input type="checkbox"/> | <input type="checkbox"/> | <input type="checkbox"/> | <input type="checkbox"/> |
| Club evenings             | <input type="checkbox"/> | <input type="checkbox"/> | <input type="checkbox"/> | <input type="checkbox"/> | <input type="checkbox"/> |
| Beekeeping journals       | <input type="checkbox"/> | <input type="checkbox"/> | <input type="checkbox"/> | <input type="checkbox"/> | <input type="checkbox"/> |
| Internet, internet forums | <input type="checkbox"/> | <input type="checkbox"/> | <input type="checkbox"/> | <input type="checkbox"/> | <input type="checkbox"/> |

## 2/ Visited apiary

**Location:** postal code\*: ..... Municipality\*: .....

Cadastral community: .....

GPS (6 decimals):

Latitude\*: ..... - Longitude\*: ..... (e.g.: 43.612454 -7.054878)

Sea level\*: .....

### Which type of landuse can be found in a 3 km radius (approximate estimation)?

- Farmland: ..... percent
- Meadows: ..... percent
- Woods: ..... percent
- Settlements: .....percent

Did you migrate the colonies of this apiary in the season 2015?  yes  no

**IF yes;** migratory movements 2015:

| Crop (nectar, pollen, honeydew source) | Country/federal state | Date of movement to crop | Date of movement from crop |
|----------------------------------------|-----------------------|--------------------------|----------------------------|
|                                        |                       |                          |                            |
|                                        |                       |                          |                            |
|                                        |                       |                          |                            |
|                                        |                       |                          |                            |
|                                        |                       |                          |                            |

## 3/ Risk factors for the introduction of exotic animals

**Have queens been imported to Austria for this company since the start of the year 2013?**

yes  no

If yes, please state the country/countries of origin: .....

**Have colonies, swarms or package bees been imported to Austria for this company since the start of the year 2013?**

yes  no

If yes, please state the country/countries of origin: .....

## 4/ Changes of colony number in the season 2014/2015

### a) Overwintering in this apiary

- Number of wintered colonies in autumn 2014\*: .....



**6/ Biotechnical and other varroa treatments in this apiary \***

*Please specify all treatments in the last 12 months as accurately as possible!*

| Type of treatment                    | Conducted                                                               | Date of treatment |  |  |  |  |
|--------------------------------------|-------------------------------------------------------------------------|-------------------|--|--|--|--|
| <b>Drone brood removal</b>           | <input type="checkbox"/> yes <input type="checkbox"/> no                |                   |  |  |  |  |
| <b>Heat treatment – whole colony</b> | <input type="checkbox"/> yes <input type="checkbox"/> no<br>device..... |                   |  |  |  |  |
| <b>Heat treatment – brood combs</b>  | <input type="checkbox"/> yes <input type="checkbox"/> no<br>device..... |                   |  |  |  |  |
| <b>Total brood removal</b>           | <input type="checkbox"/> yes <input type="checkbox"/> no                |                   |  |  |  |  |
| <b>Brood interruption</b>            | <input type="checkbox"/> yes <input type="checkbox"/> no                |                   |  |  |  |  |
| <b>Trap comb method</b>              | <input type="checkbox"/> yes <input type="checkbox"/> no                |                   |  |  |  |  |
|                                      |                                                                         |                   |  |  |  |  |
|                                      |                                                                         |                   |  |  |  |  |
|                                      |                                                                         |                   |  |  |  |  |
|                                      |                                                                         |                   |  |  |  |  |
|                                      |                                                                         |                   |  |  |  |  |
|                                      |                                                                         |                   |  |  |  |  |

Supporting information: L Morawetz, H Köglberger, A Griesbacher, I Derakhshifar, K Crailsheim, R Brodschneider, R Moosbeckhofer; Health status of honey bee colonies (*Apis mellifera*) and disease-related risk factors for colony losses in Austria

## 7/ Winter losses 2014 / 2015

*This chapter deals with the winter losses of **ALL colonies of the beekeeping** operation and not only of the sampled apiary. The questions are from the internet platform 'bienenstand.at' from the University of Graz, which is also a part of 'Zukunft Biene'. Please answer this part also if the beekeeper had already participated in the survey of the University of Graz.*

**Did the beekeeper participate in the winter loss survey 2014/2015 of the University of Graz (Bienenstand.at)?\***

yes       no

**In which district are the apiaries located?\***

in one district:.....

in more than one district

**Where is the main apiary located? Please state the name of the municipality and postal code.\***

Municipality.....; Postal code: .....

**How many apiaries are part of the beekeeping operation?\*** .....

**Are all these apiaries within a distance of about 15 km of each other?\***

yes       uncertain       no

**How many colonies were overwintered in the winter 2014/15?\*** .....

**How many colonies were lost in the winter 2014/2015\***

- Because of dead colonies or empty hives?.....
- because of unsolvable queen problems?.....

Supporting information: L Morawetz, H Köglberger, A Griesbacher, I Derakhshifar, K Crailsheim, R Brodschneider, R Moosbeckhofer; Health status of honey bee colonies (*Apis mellifera*) and disease-related risk factors for colony losses in Austria

### List of samples taken

Please fill in accordingly

| A) DESCRIPTION OF THE COLONY*                                    | ID of focus colony |   |   |   |   |   |   |   |   |    |    |    |
|------------------------------------------------------------------|--------------------|---|---|---|---|---|---|---|---|----|----|----|
|                                                                  | 1                  | 2 | 3 | 4 | 5 | 6 | 7 | 8 | 9 | 10 | 11 | 12 |
| Queen emerged in the year...                                     |                    |   |   |   |   |   |   |   |   |    |    |    |
| Productive colony ( <b>WV</b> ) or young colony ( <b>JV</b> )    |                    |   |   |   |   |   |   |   |   |    |    |    |
| Young colony: artificial swarm ( <b>KS</b> ) or nuc ( <b>A</b> ) |                    |   |   |   |   |   |   |   |   |    |    |    |
| Colony migrated in this season: yes (J) or no (N)                |                    |   |   |   |   |   |   |   |   |    |    |    |
| Hive type (if different: brood super + honey supers)             |                    |   |   |   |   |   |   |   |   |    |    |    |
| Number of supers                                                 |                    |   |   |   |   |   |   |   |   |    |    |    |
| Number of frames per super                                       |                    |   |   |   |   |   |   |   |   |    |    |    |
| Colony size<br>(1: very weak; 2: normal; 3: very strong)         |                    |   |   |   |   |   |   |   |   |    |    |    |

PLEASE check all that apply:

| B.1) OBSERVED SYMPTOMS BEFORE COLONY OPENING*     | 1                        | 2                        | 3                        | 4                        | 5                        | 6                        | 7                        | 8                        | 9                        | 10                       | 11                       | 12                       |
|---------------------------------------------------|--------------------------|--------------------------|--------------------------|--------------------------|--------------------------|--------------------------|--------------------------|--------------------------|--------------------------|--------------------------|--------------------------|--------------------------|
| Dead bees in front of the hive                    | <input type="checkbox"/> | <input type="checkbox"/> | <input type="checkbox"/> | <input type="checkbox"/> | <input type="checkbox"/> | <input type="checkbox"/> | <input type="checkbox"/> | <input type="checkbox"/> | <input type="checkbox"/> | <input type="checkbox"/> | <input type="checkbox"/> | <input type="checkbox"/> |
| Bees unable to fly, crawlers in front of the hive | <input type="checkbox"/> | <input type="checkbox"/> | <input type="checkbox"/> | <input type="checkbox"/> | <input type="checkbox"/> | <input type="checkbox"/> | <input type="checkbox"/> | <input type="checkbox"/> | <input type="checkbox"/> | <input type="checkbox"/> | <input type="checkbox"/> | <input type="checkbox"/> |
| Fecal marks                                       | <input type="checkbox"/> | <input type="checkbox"/> | <input type="checkbox"/> | <input type="checkbox"/> | <input type="checkbox"/> | <input type="checkbox"/> | <input type="checkbox"/> | <input type="checkbox"/> | <input type="checkbox"/> | <input type="checkbox"/> | <input type="checkbox"/> | <input type="checkbox"/> |
| Trembling bees                                    | <input type="checkbox"/> | <input type="checkbox"/> | <input type="checkbox"/> | <input type="checkbox"/> | <input type="checkbox"/> | <input type="checkbox"/> | <input type="checkbox"/> | <input type="checkbox"/> | <input type="checkbox"/> | <input type="checkbox"/> | <input type="checkbox"/> | <input type="checkbox"/> |
| Black and shiny bees                              | <input type="checkbox"/> | <input type="checkbox"/> | <input type="checkbox"/> | <input type="checkbox"/> | <input type="checkbox"/> | <input type="checkbox"/> | <input type="checkbox"/> | <input type="checkbox"/> | <input type="checkbox"/> | <input type="checkbox"/> | <input type="checkbox"/> | <input type="checkbox"/> |
| Rejected bees                                     | <input type="checkbox"/> | <input type="checkbox"/> | <input type="checkbox"/> | <input type="checkbox"/> | <input type="checkbox"/> | <input type="checkbox"/> | <input type="checkbox"/> | <input type="checkbox"/> | <input type="checkbox"/> | <input type="checkbox"/> | <input type="checkbox"/> | <input type="checkbox"/> |
| Thrown out brood                                  | <input type="checkbox"/> | <input type="checkbox"/> | <input type="checkbox"/> | <input type="checkbox"/> | <input type="checkbox"/> | <input type="checkbox"/> | <input type="checkbox"/> | <input type="checkbox"/> | <input type="checkbox"/> | <input type="checkbox"/> | <input type="checkbox"/> | <input type="checkbox"/> |
| Crowded entrance                                  | <input type="checkbox"/> | <input type="checkbox"/> | <input type="checkbox"/> | <input type="checkbox"/> | <input type="checkbox"/> | <input type="checkbox"/> | <input type="checkbox"/> | <input type="checkbox"/> | <input type="checkbox"/> | <input type="checkbox"/> | <input type="checkbox"/> | <input type="checkbox"/> |
| Other (set footnote & describe below)             |                          |                          |                          |                          |                          |                          |                          |                          |                          |                          |                          |                          |

Please note extraordinary observations and symptoms ():  
e.g. dead colonies in the apiary, use of back-opening hives,...

Abbreviation hive types:  
 Z ..... Zander  
 ZF ..... Zander flach  
 DN = EM ..... Deutschnormal, Einheitsmaß  
 BW ..... Breitwabe  
 D ..... Dadant  
 If other hive type is used, define abbreviation here:

### List of samples taken

Please check all that apply:

| <b>B.2) OBSERVED SYMPTOMS IN THE COLONY*</b>                                   | <b>1</b>                 | <b>2</b>                 | <b>3</b>                 | <b>4</b>                 | <b>5</b>                 | <b>6</b>                 | <b>7</b>                 | <b>8</b>                 | <b>9</b>                 | <b>10</b>                | <b>11</b>                | <b>12</b>                |
|--------------------------------------------------------------------------------|--------------------------|--------------------------|--------------------------|--------------------------|--------------------------|--------------------------|--------------------------|--------------------------|--------------------------|--------------------------|--------------------------|--------------------------|
| Patchy brood pattern                                                           | <input type="checkbox"/> | <input type="checkbox"/> | <input type="checkbox"/> | <input type="checkbox"/> | <input type="checkbox"/> | <input type="checkbox"/> | <input type="checkbox"/> | <input type="checkbox"/> | <input type="checkbox"/> | <input type="checkbox"/> | <input type="checkbox"/> | <input type="checkbox"/> |
| Cell cappings punctured                                                        | <input type="checkbox"/> | <input type="checkbox"/> | <input type="checkbox"/> | <input type="checkbox"/> | <input type="checkbox"/> | <input type="checkbox"/> | <input type="checkbox"/> | <input type="checkbox"/> | <input type="checkbox"/> | <input type="checkbox"/> | <input type="checkbox"/> | <input type="checkbox"/> |
| Cell cappings concave / discolored                                             | <input type="checkbox"/> | <input type="checkbox"/> | <input type="checkbox"/> | <input type="checkbox"/> | <input type="checkbox"/> | <input type="checkbox"/> | <input type="checkbox"/> | <input type="checkbox"/> | <input type="checkbox"/> | <input type="checkbox"/> | <input type="checkbox"/> | <input type="checkbox"/> |
| Slumped larvae                                                                 | <input type="checkbox"/> | <input type="checkbox"/> | <input type="checkbox"/> | <input type="checkbox"/> | <input type="checkbox"/> | <input type="checkbox"/> | <input type="checkbox"/> | <input type="checkbox"/> | <input type="checkbox"/> | <input type="checkbox"/> | <input type="checkbox"/> | <input type="checkbox"/> |
| Discolored larvae / pupae                                                      | <input type="checkbox"/> | <input type="checkbox"/> | <input type="checkbox"/> | <input type="checkbox"/> | <input type="checkbox"/> | <input type="checkbox"/> | <input type="checkbox"/> | <input type="checkbox"/> | <input type="checkbox"/> | <input type="checkbox"/> | <input type="checkbox"/> | <input type="checkbox"/> |
| Dead larvae                                                                    | <input type="checkbox"/> | <input type="checkbox"/> | <input type="checkbox"/> | <input type="checkbox"/> | <input type="checkbox"/> | <input type="checkbox"/> | <input type="checkbox"/> | <input type="checkbox"/> | <input type="checkbox"/> | <input type="checkbox"/> | <input type="checkbox"/> | <input type="checkbox"/> |
| Typical AFB smell                                                              | <input type="checkbox"/> | <input type="checkbox"/> | <input type="checkbox"/> | <input type="checkbox"/> | <input type="checkbox"/> | <input type="checkbox"/> | <input type="checkbox"/> | <input type="checkbox"/> | <input type="checkbox"/> | <input type="checkbox"/> | <input type="checkbox"/> | <input type="checkbox"/> |
| Glue-like larval remains                                                       | <input type="checkbox"/> | <input type="checkbox"/> | <input type="checkbox"/> | <input type="checkbox"/> | <input type="checkbox"/> | <input type="checkbox"/> | <input type="checkbox"/> | <input type="checkbox"/> | <input type="checkbox"/> | <input type="checkbox"/> | <input type="checkbox"/> | <input type="checkbox"/> |
| Scales                                                                         | <input type="checkbox"/> | <input type="checkbox"/> | <input type="checkbox"/> | <input type="checkbox"/> | <input type="checkbox"/> | <input type="checkbox"/> | <input type="checkbox"/> | <input type="checkbox"/> | <input type="checkbox"/> | <input type="checkbox"/> | <input type="checkbox"/> | <input type="checkbox"/> |
| Sacbrood symptoms (dead larvae with saclike appearance, gondola-shaped scales) | <input type="checkbox"/> | <input type="checkbox"/> | <input type="checkbox"/> | <input type="checkbox"/> | <input type="checkbox"/> | <input type="checkbox"/> | <input type="checkbox"/> | <input type="checkbox"/> | <input type="checkbox"/> | <input type="checkbox"/> | <input type="checkbox"/> | <input type="checkbox"/> |
| Chalkbrood mummies                                                             | <input type="checkbox"/> | <input type="checkbox"/> | <input type="checkbox"/> | <input type="checkbox"/> | <input type="checkbox"/> | <input type="checkbox"/> | <input type="checkbox"/> | <input type="checkbox"/> | <input type="checkbox"/> | <input type="checkbox"/> | <input type="checkbox"/> | <input type="checkbox"/> |
| Bees with deformed wings                                                       | <input type="checkbox"/> | <input type="checkbox"/> | <input type="checkbox"/> | <input type="checkbox"/> | <input type="checkbox"/> | <input type="checkbox"/> | <input type="checkbox"/> | <input type="checkbox"/> | <input type="checkbox"/> | <input type="checkbox"/> | <input type="checkbox"/> | <input type="checkbox"/> |
| Varroa mites on bees                                                           | <input type="checkbox"/> | <input type="checkbox"/> | <input type="checkbox"/> | <input type="checkbox"/> | <input type="checkbox"/> | <input type="checkbox"/> | <input type="checkbox"/> | <input type="checkbox"/> | <input type="checkbox"/> | <input type="checkbox"/> | <input type="checkbox"/> | <input type="checkbox"/> |
| Varroa mites embedded in cell cappings                                         | <input type="checkbox"/> | <input type="checkbox"/> | <input type="checkbox"/> | <input type="checkbox"/> | <input type="checkbox"/> | <input type="checkbox"/> | <input type="checkbox"/> | <input type="checkbox"/> | <input type="checkbox"/> | <input type="checkbox"/> | <input type="checkbox"/> | <input type="checkbox"/> |
| Suspicious mites (besides Varroa mites)                                        | <input type="checkbox"/> | <input type="checkbox"/> | <input type="checkbox"/> | <input type="checkbox"/> | <input type="checkbox"/> | <input type="checkbox"/> | <input type="checkbox"/> | <input type="checkbox"/> | <input type="checkbox"/> | <input type="checkbox"/> | <input type="checkbox"/> | <input type="checkbox"/> |
| Suspicious eggs / larvae / beetles                                             | <input type="checkbox"/> | <input type="checkbox"/> | <input type="checkbox"/> | <input type="checkbox"/> | <input type="checkbox"/> | <input type="checkbox"/> | <input type="checkbox"/> | <input type="checkbox"/> | <input type="checkbox"/> | <input type="checkbox"/> | <input type="checkbox"/> | <input type="checkbox"/> |
| Other (describe below)                                                         | <input type="checkbox"/> | <input type="checkbox"/> | <input type="checkbox"/> | <input type="checkbox"/> | <input type="checkbox"/> | <input type="checkbox"/> | <input type="checkbox"/> | <input type="checkbox"/> | <input type="checkbox"/> | <input type="checkbox"/> | <input type="checkbox"/> | <input type="checkbox"/> |

| <b>C) SUSPICION OF *</b>                                      | <b>1</b>                 | <b>2</b>                 | <b>3</b>                 | <b>4</b>                 | <b>5</b>                 | <b>6</b>                 | <b>7</b>                 | <b>8</b>                 | <b>9</b>                 | <b>10</b>                | <b>11</b>                | <b>12</b>                |
|---------------------------------------------------------------|--------------------------|--------------------------|--------------------------|--------------------------|--------------------------|--------------------------|--------------------------|--------------------------|--------------------------|--------------------------|--------------------------|--------------------------|
| Varroosis                                                     | <input type="checkbox"/> | <input type="checkbox"/> | <input type="checkbox"/> | <input type="checkbox"/> | <input type="checkbox"/> | <input type="checkbox"/> | <input type="checkbox"/> | <input type="checkbox"/> | <input type="checkbox"/> | <input type="checkbox"/> | <input type="checkbox"/> | <input type="checkbox"/> |
| American Foulbrood (if suspicion: sample mandatory!)          | <input type="checkbox"/> | <input type="checkbox"/> | <input type="checkbox"/> | <input type="checkbox"/> | <input type="checkbox"/> | <input type="checkbox"/> | <input type="checkbox"/> | <input type="checkbox"/> | <input type="checkbox"/> | <input type="checkbox"/> | <input type="checkbox"/> | <input type="checkbox"/> |
| European Foulbrood (if suspicion: sample mandatory!)          | <input type="checkbox"/> | <input type="checkbox"/> | <input type="checkbox"/> | <input type="checkbox"/> | <input type="checkbox"/> | <input type="checkbox"/> | <input type="checkbox"/> | <input type="checkbox"/> | <input type="checkbox"/> | <input type="checkbox"/> | <input type="checkbox"/> | <input type="checkbox"/> |
| Sacbrood                                                      | <input type="checkbox"/> | <input type="checkbox"/> | <input type="checkbox"/> | <input type="checkbox"/> | <input type="checkbox"/> | <input type="checkbox"/> | <input type="checkbox"/> | <input type="checkbox"/> | <input type="checkbox"/> | <input type="checkbox"/> | <input type="checkbox"/> | <input type="checkbox"/> |
| Chalkbrood                                                    | <input type="checkbox"/> | <input type="checkbox"/> | <input type="checkbox"/> | <input type="checkbox"/> | <input type="checkbox"/> | <input type="checkbox"/> | <input type="checkbox"/> | <input type="checkbox"/> | <input type="checkbox"/> | <input type="checkbox"/> | <input type="checkbox"/> | <input type="checkbox"/> |
| Nosemosis (if suspicion: sample mandatory!)                   | <input type="checkbox"/> | <input type="checkbox"/> | <input type="checkbox"/> | <input type="checkbox"/> | <input type="checkbox"/> | <input type="checkbox"/> | <input type="checkbox"/> | <input type="checkbox"/> | <input type="checkbox"/> | <input type="checkbox"/> | <input type="checkbox"/> | <input type="checkbox"/> |
| Chronic Bee Paralysis Virus (if suspicion: sample mandatory!) | <input type="checkbox"/> | <input type="checkbox"/> | <input type="checkbox"/> | <input type="checkbox"/> | <input type="checkbox"/> | <input type="checkbox"/> | <input type="checkbox"/> | <input type="checkbox"/> | <input type="checkbox"/> | <input type="checkbox"/> | <input type="checkbox"/> | <input type="checkbox"/> |
| Deformed Wing Virus (if suspicion: sample mandatory!)         | <input type="checkbox"/> | <input type="checkbox"/> | <input type="checkbox"/> | <input type="checkbox"/> | <input type="checkbox"/> | <input type="checkbox"/> | <input type="checkbox"/> | <input type="checkbox"/> | <input type="checkbox"/> | <input type="checkbox"/> | <input type="checkbox"/> | <input type="checkbox"/> |
| Small hive beetle (if suspicion: sample mandatory!)           | <input type="checkbox"/> | <input type="checkbox"/> | <input type="checkbox"/> | <input type="checkbox"/> | <input type="checkbox"/> | <input type="checkbox"/> | <input type="checkbox"/> | <input type="checkbox"/> | <input type="checkbox"/> | <input type="checkbox"/> | <input type="checkbox"/> | <input type="checkbox"/> |
| Tropilaelaps mite (if suspicion: sample mandatory!)           | <input type="checkbox"/> | <input type="checkbox"/> | <input type="checkbox"/> | <input type="checkbox"/> | <input type="checkbox"/> | <input type="checkbox"/> | <input type="checkbox"/> | <input type="checkbox"/> | <input type="checkbox"/> | <input type="checkbox"/> | <input type="checkbox"/> | <input type="checkbox"/> |
| Other (describe below)                                        | <input type="checkbox"/> | <input type="checkbox"/> | <input type="checkbox"/> | <input type="checkbox"/> | <input type="checkbox"/> | <input type="checkbox"/> | <input type="checkbox"/> | <input type="checkbox"/> | <input type="checkbox"/> | <input type="checkbox"/> | <input type="checkbox"/> | <input type="checkbox"/> |
| <b>Dead colony (only visit 2 or 3)</b>                        | <input type="checkbox"/> | <input type="checkbox"/> | <input type="checkbox"/> | <input type="checkbox"/> | <input type="checkbox"/> | <input type="checkbox"/> | <input type="checkbox"/> | <input type="checkbox"/> | <input type="checkbox"/> | <input type="checkbox"/> | <input type="checkbox"/> | <input type="checkbox"/> |

**List of samples taken**

| SAMPLING*                                                                       | ID of focus colony |   |   |   |   |   |   |
|---------------------------------------------------------------------------------|--------------------|---|---|---|---|---|---|
|                                                                                 | 1                  | 2 | 3 | 4 | 5 | 6 | 7 |
| <b>Mandatory samples – note sample number</b>                                   |                    |   |   |   |   |   |   |
| Bee sample Varroa<br>Large cup<br><b>Visits 1 and 2</b>                         |                    |   |   |   |   |   |   |
| Bee sample Posthoc<br>Small cup<br><b>All visits</b>                            |                    |   |   |   |   |   |   |
| Beebread sample<br><b>All visits</b>                                            |                    |   |   |   |   |   |   |
| <b>Samples taken, when suspicion for disease – stick label in correct place</b> |                    |   |   |   |   |   |   |
| Bees –<br>Sampled outside the colony                                            |                    |   |   |   |   |   |   |
| Bees –<br>Sampled inside the colony                                             |                    |   |   |   |   |   |   |
| Suspicious brood comb                                                           |                    |   |   |   |   |   |   |
| Suspicious mite                                                                 |                    |   |   |   |   |   |   |
| Suspicious beetle/ beetle larvae                                                |                    |   |   |   |   |   |   |
| Other (describe below)                                                          |                    |   |   |   |   |   |   |
