# Supplementary material for: Health status of honey bee colonies (Apis mellifera) and disease-related risk factors for colony losses in Austria
Source: PubMed Central journal article supplement (PMC6615611; doi:10.1371/journal.pone.0219293), 2019-07-09
Supplement: pone.0219293.s006.pdf [file pone.0219293.s006.pdf]

Supporting information: L Morawetz, H Köglberger, A Griesbacher, I Derakhshifar, K Crailsheim, R Brodschneider, R Moosbeckhofer; Health status of honey bee colonies (*Apis mellifera*) and disease-related risk factors for colony losses in Austria

**S6 Table. Primers and PCR-parameters for the tests for *Nosema apis*, *Nosema ceranae* and CBPV.**

| Agent             | Primers (5´-3´)                                                                | Amplifikation product [bp] | Authors                        |
|-------------------|--------------------------------------------------------------------------------|----------------------------|--------------------------------|
| <i>N. apis</i>    | GGG GGC ATG TCT TTG ACG TAC TAT GTA<br>GGG GGG CGT TTA AAA TGT GAA ACA ACT ATG | 321                        | Martín-Hernández et al. (2007) |
| <i>N. ceranae</i> | CGG CGA CGA TGT GAT ATG AAA ATA TTA A<br>CCC GGT CAT TCT CAA ACA AAA AAC CG    | 218                        | Martín-Hernández et al. (2007) |
| CBPV              | TCA GAC ACC GAA TCT GAT TAT TG<br>ACT ACT AGA AAC TCG TCG CTT CG               | 570                        | Blanchard et al. (2008)        |

Martín-Hernández R, Meana A, Prieto L, Salvador AM, Garrido-Bailón E, Higes M. Outcome of Colonization of *Apis mellifera* by *Nosema ceranae*. *Appl Environ Microbiol.* 2007;73(20):6331-8.

Blanchard P, Olivier V, Iscache A-L, Celle O, Schurr F, Lallemand P, et al. Improvement of RT-PCR detection of chronic bee paralysis virus (CBPV) required by the description of genomic variability in French CBPV isolates. *J Invertebr Pathol.* 2008;97(2):182-5.
