# Supplementary material for: Health status of honey bee colonies (Apis mellifera) and disease-related risk factors for colony losses in Austria
Source: PubMed Central journal article supplement (PMC6615611; doi:10.1371/journal.pone.0219293), 2019-07-09
Supplement: pone.0219293.s007.pdf [file pone.0219293.s007.pdf]

**S7 Table. Clinical prevalence of six bee diseases and colony losses.** Correlation between clinical prevalence of six diseases in the observed 1596 colonies and survival of the colonies in summer 2015 (between July 2015 – September 2015) and the winter season 2015/16, respectively. The percentage of dead colonies per group (=row) is given in brackets. Each variable is tested with a Chi<sup>2</sup>-Test or a Fisher's Exact Test (FET), respectively. Diseases without positive cases were not tested and are therefore not shown. Significant results are shaded in gray.

| Visit                              | Observed disease | Symptoms | Summer losses                  |                                                 |                          | Winter losses                  |                                                 |                                                 |
|------------------------------------|------------------|----------|--------------------------------|-------------------------------------------------|--------------------------|--------------------------------|-------------------------------------------------|-------------------------------------------------|
|                                    |                  |          | N° colonies alive autumn visit | N° colonies dead in summer                      | Effect on summer losses? | N° colonies alive spring visit | N° colonies dead in winter                      | Effect on winter losses?                        |
| First visit summer 2015<br>N=1598* | AFB              | Negative | 1553                           | 39 (2.4 %)                                      | P < 0.001, FET           | 1422                           | 131 (8.4 %)                                     | ---                                             |
|                                    |                  | Positive | 0                              | 3 (100.0 %)                                     |                          | 0                              | 0                                               |                                                 |
|                                    | CBPV             | Negative | 1552                           | 42 (2.6 %)                                      | P = 1.000, FET           | 1421                           | 131 (8.4 %)                                     | P = 1.000, FET                                  |
|                                    |                  | Positive | 1                              | 0 (0.0 %)                                       |                          | 1                              | 0 (0.0 %)                                       |                                                 |
|                                    | Chalkbrood       | Negative | 1495                           | 42 (2.7 %)                                      | P = 0.441 FET            | 1368                           | 127 (8.5 %)                                     | Chi <sup>2</sup> = 0.036, df = 1,<br>P = 0.8501 |
|                                    |                  | Positive | 58                             | 0 (0.0 %)                                       |                          | 54                             | 4 (6.9 %)                                       |                                                 |
| Nosemosis                          | Negative         | 1550     | 42 (2.6 %)                     | P = 1.000, FET                                  | 1420                     | 130 (8.4 %)                    | P = 0.232, FET                                  |                                                 |
|                                    | Positive         | 3        | 0 (0.0 %)                      |                                                 | 2                        | 1 (33.3%)                      |                                                 |                                                 |
| Sacbrood                           | Negative         | 1534     | 41 (2.6 %)                     | P = 0.416 FET                                   | 1405                     | 129 (8.4 %)                    | P = 0.695, FET                                  |                                                 |
|                                    | Positive         | 19       | 1 (5.0 %)                      |                                                 | 17                       | 2 (10.5 %)                     |                                                 |                                                 |
| Varroosis/ DWV                     | Negative         | 1479     | 33 (2.2 %)                     | P < 0.001 FET                                   | 1363                     | 116 (7.8 %)                    | Chi <sup>2</sup> = 12.528,<br>df = 1, P < 0.001 |                                                 |
|                                    | Positive         | 74       | 9 (10.8 %)                     |                                                 | 59                       | 15 (20.3 %)                    |                                                 |                                                 |
| Second visit autumn 2015<br>N=1554 | AFB              | Negative |                                |                                                 |                          | 1423                           | 131 (8.4 %)                                     | ---                                             |
|                                    |                  | Positive |                                |                                                 |                          | 0                              | 0                                               |                                                 |
|                                    | CBPV             | Negative |                                |                                                 |                          | 1421                           | 131 (8.4 %)                                     | P = 1.000, FET                                  |
|                                    |                  | Positive |                                |                                                 |                          | 2                              | 0 (0.0 %)                                       |                                                 |
|                                    | Chalkbrood       | Negative |                                |                                                 |                          | 1412                           | 131 (8.5 %)                                     | P = 1.000, FET                                  |
|                                    |                  | Positive |                                |                                                 |                          | 11                             | 0 (0.0 %)                                       |                                                 |
| Nosemosis                          | Negative         | 1423     | 131 (8.4 %)                    | ---                                             |                          |                                |                                                 |                                                 |
|                                    | Positive         | 0        | 0                              |                                                 |                          |                                |                                                 |                                                 |
| Sacbrood                           | Negative         | 1421     | 130 (8.4 %)                    | P = 0.232, FET                                  |                          |                                |                                                 |                                                 |
|                                    | Positive         | 2        | 1 (33.3 %)                     |                                                 |                          |                                |                                                 |                                                 |
| Varroosis /DWV                     | Negative         | 1360     | 113 (7.7 %)                    | Chi <sup>2</sup> = 19.216, df = 1,<br>P < 0.001 |                          |                                |                                                 |                                                 |
|                                    | Positive         | 63       | 18 (22.2 %)                    |                                                 |                          |                                |                                                 |                                                 |

\*one missing value, because colony was not inspected, it survived the winter 2015/16
