# Supplementary material for: Health status of honey bee colonies (Apis mellifera) and disease-related risk factors for colony losses in Austria
Source: PubMed Central journal article supplement (PMC6615611; doi:10.1371/journal.pone.0219293), 2019-07-09
Supplement: pone.0219293.s008.pdf [file pone.0219293.s008.pdf]

Supporting information: L Morawetz, H Köglberger, A Griesbacher, I Derakhshifar, K Crailsheim, R Brodschneider, R Moosbeckhofer; Health status of honey bee colonies (*Apis mellifera*) and disease-related risk factors for colony losses in Austria

**S8 Table. Categorical colony characteristics related with survival in summer 2015 (summer losses) and winter 2015/16 (winter losses), respectively.** The percentage of dead colonies per group (=row) is given in brackets. Each variable is tested with a Chi<sup>2</sup>-Test or a Fisher's Exact Test (FET), respectively. Number of missing values for each Variable and testing periods are given. n = 1569 colonies.

|                              |                             |                       | Summer losses                  |                            |                                              | Winter losses                  |                            |                                              |
|------------------------------|-----------------------------|-----------------------|--------------------------------|----------------------------|----------------------------------------------|--------------------------------|----------------------------|----------------------------------------------|
| Variable                     | Missing values              | Levels                | N° colonies alive autumn visit | N° colonies dead in summer | Effect on summer losses?                     | N° colonies alive spring visit | N° colonies dead in winter | Effect on winter losses?                     |
| Type of the colony in spring | Summer: 41;<br>Winter: 40   | Nuc/swarm             | 307                            | 5 (1.6 %)                  | Chi <sup>2</sup> = 1.161, df = 1, P = 0.281  | 292                            | 15 (4.9 %)                 | Chi <sup>2</sup> = .054, df = 1, P = 0.025   |
|                              |                             | Productive colony     | 1207                           | 36 (2.9 %)                 |                                              | 1098                           | 109 (9.0 %)                |                                              |
| Migrating events in spring   | Summer: 57;<br>Winter: 57   | Colony migrated       | 199                            | 5 (2.5 %)                  | Chi <sup>2</sup> = 0.000, df = 1, P = 0.975  | 189                            | 10 (5.0 %)                 | Chi <sup>2</sup> = 2.147, df = 1, P = 0.143  |
|                              |                             | Colony not migrated   | 1298                           | 37 (2.8 %)                 |                                              | 1190                           | 108 (8.3 %)                |                                              |
| Colony size summer visit     | Summer: 65;<br>Winter: 65   | Weak                  | 185                            | 19 (9.3 %)                 | Chi <sup>2</sup> = 38.192, df = 2, P < 0.001 | 166                            | 19 (10.3 %)                | Chi <sup>2</sup> = 1.595, df = 2, P = 0.450  |
|                              |                             | Normal                | 848                            | 14 (1.6 %)                 |                                              | 782                            | 66 (7.8 %)                 |                                              |
|                              |                             | strong                | 456                            | 9 (1.9 %)                  |                                              | 414                            | 42 (9.2 %)                 |                                              |
| Colony size autumn visit     | Winter: 33                  | Weak                  |                                |                            |                                              | 147                            | 35 (19.2 %)                | Chi <sup>2</sup> = 30.389, df = 2, P < 0.001 |
|                              |                             | Normal                |                                |                            |                                              | 955                            | 75 (7.3 %)                 |                                              |
|                              |                             | strong                |                                |                            |                                              | 289                            | 20 (6.5 %)                 |                                              |
| Queen age at time of visit   | Summer: 123;<br>Winter: 121 | 2 years and more      | 261                            | 5 (1.9 %)                  | Chi <sup>2</sup> = 2.355, df = 2, P = 0.308  | 168                            | 26 (13.4 %)                | Chi <sup>2</sup> = 14.99, df = 2, P < 0.001  |
|                              |                             | 1 year                | 615                            | 19 (3.0 %)                 |                                              | 472                            | 50 (9.6 %)                 |                                              |
|                              |                             | 0 years               | 563                            | 10 (1.7 %)                 |                                              | 677                            | 40 (5.6 %)                 |                                              |
| Queen problems               | Summer: 106;<br>Winter: 97  | Queen problem         | 13                             | 4 (23.5 %)                 | FET < 0.001                                  | 21                             | 3 (12.5 %)                 | FET: P = 0.439                               |
|                              |                             | Normal queen          | 1439                           | 34 (2.4 %)                 |                                              | 1317                           | 116 (8.1 %)                |                                              |
| Winter food                  | Winter: 0                   | Sugar                 |                                |                            |                                              | 645                            | 59 (8.4 %)                 | Chi <sup>2</sup> = 0.954, df = 2, P = 0.621  |
|                              |                             | Commercial mixture    |                                |                            |                                              | 683                            | 66 (8.8 %)                 |                                              |
|                              |                             | Sugar + commercial    |                                |                            |                                              | 95                             | 6 (5.9 %)                  |                                              |
| Highest beekeeper education  | Summer: 0;<br>Winter: 0     | No education          | 176                            | 1 (0.6 %)                  | Chi <sup>2</sup> = 5.679, df = 3, P = 0.128  | 160                            | 16 (9.1 %)                 | Chi <sup>2</sup> = 2.506, df = 3, P = 0.474  |
|                              |                             | Beginners' course     | 146                            | 2 (1.4 %)                  |                                              | 132                            | 14 (9.6 %)                 |                                              |
|                              |                             | advanced courses      | 610                            | 22 (3.5 %)                 |                                              | 567                            | 43 (7.0 %)                 |                                              |
|                              |                             | Professional training | 622                            | 17 (2.7 %)                 |                                              | 564                            | 58 (9.3 %)                 |                                              |
| Organic beekeeping           | Summer: 0;<br>Winter: 0     | Conventional          | 1264                           | 34 (2.6 %)                 | Chi <sup>2</sup> = 0.000, df = 1, P = 1.000  | 1160                           | 104 (8.2 %)                | Chi <sup>2</sup> = 0.232, df = 1, P = 0.630  |
|                              |                             | Organic               | 290                            | 8 (2.7 %)                  |                                              | 263                            | 27 (9.3 %)                 |                                              |
