# Supplementary material for: Health status of honey bee colonies (Apis mellifera) and disease-related risk factors for colony losses in Austria
Source: PubMed Central journal article supplement (PMC6615611; doi:10.1371/journal.pone.0219293), 2019-07-09
Supplement: pone.0219293.s010.pdf [file pone.0219293.s010.pdf]

Supporting information: L Morawetz, H Köglberger, A Griesbacher, I Derakhshifar, K Crailsheim, R Brodschneider, R Moosbeckhofer; Health status of honey bee colonies (*Apis mellifera*) and disease-related risk factors for colony losses in Austria

**S10 Table. Correlation between small size of the colonies and colony characteristics, diseases.** The percentage of weak colonies per group (=row) is given in brackets. Each variable is tested with a Chi<sup>2</sup>-Test or a Fisher's Exact Test (FET), respectively. Significant results are shaded in gray.

| Variable                      | Levels            | Summer visit                       |                                           |                                              | Autumn visit                       |                                          |                                             |
|-------------------------------|-------------------|------------------------------------|-------------------------------------------|----------------------------------------------|------------------------------------|------------------------------------------|---------------------------------------------|
|                               |                   | N° colonies rated strong or normal | N° (percentage) colonies rated very small | Statistics                                   | N° colonies rated strong or normal | N° (percentage) colonies rated very weak | Statistics                                  |
| Queen problems                | Normal queen      | 1234                               | 178 (13 %)                                | FET: P<0.001                                 | 1236                               | 164 (12%)                                | FET: P=0.005                                |
|                               | Queen problem     | 7                                  | 10 (59 %)                                 |                                              | 16                                 | 8 (33%)                                  |                                             |
| Queen age at time of visit    | 2 years and more  | 239                                | 21 (8 %)                                  | Chi <sup>2</sup> = 36.044, df = 2, P < 0.001 | 171                                | 20 (10%)                                 | Chi <sup>2</sup> = 9.525, df = 2, P = 0.009 |
|                               | 1 year            | 556                                | 52 (9 %)                                  |                                              | 466                                | 44 (9%)                                  |                                             |
|                               | 0 years           | 439                                | 105 (19 %)                                |                                              | 599                                | 100 (14%)                                |                                             |
| Type of the colony in spring  | Nuc/swarm         | 223                                | 70 (24 %)                                 | Chi <sup>2</sup> = 44.921, df = 1, P < 0.001 | 245                                | 52 (18 %)                                | Chi <sup>2</sup> = 9.459, df = 1, P = 0.002 |
|                               | Productive colony | 1060                               | 109 (9 %)                                 |                                              | 1059                               | 128 (11 %)                               |                                             |
| Varroa level at time of visit | 0.00 %            | 624                                | 104 (14 %)                                | Chi <sup>2</sup> = 6.537, df = 2, P = 0.038  | 408                                | 52 (11 %)                                | Chi <sup>2</sup> = 7.488, df = 2, P = 0.024 |
|                               | 0.01 %-3.00 %     | 572                                | 64 (10 %)                                 |                                              | 680                                | 67 (9 %)                                 |                                             |
|                               | >3.00 %           | 122                                | 13 (10 %)                                 |                                              | 248                                | 43 (15 %)                                |                                             |
| AFB                           | Negative          | 1326                               | 202 (13%)                                 | FET: P = 0.048                               | 1339                               | 182 (12 %)                               | ---                                         |
|                               | Positive          | 1                                  | 2 (67%)                                   |                                              | 0                                  | 0 (0%)                                   |                                             |
| CBPV                          | Negative          | 1326                               | 204 (13%)                                 | ---                                          | 1337                               | 182 (12 %)                               | FET: P = 1.000                              |
|                               | Positive          | 1                                  | 0 (0%)                                    |                                              | 2                                  | 0 (0 %)                                  |                                             |
| Chalkbrood                    | Negative          | 1276                               | 197 (13%)                                 | Chi <sup>2</sup> = 0.008, df = 1, P = 0.928  | 1328                               | 182 (12 %)                               | FET: P = 0.380                              |
|                               | Positive          | 51                                 | 7 (12%)                                   |                                              | 11                                 | 0 (0%)                                   |                                             |
| Nosemosis                     | Negative          | 1324                               | 204 (13%)                                 | FET: P = 1.000                               | 1339                               | 182 (12 %)                               | ---                                         |
|                               | Positive          | 3                                  | 0 (0%)                                    |                                              | 0                                  | 0 (0%)                                   |                                             |
| Sacbrood                      | Negative          | 1312                               | 199 (13%)                                 | FET: P = 0.172                               | 1338                               | 180 (12%)                                | FET: P = 0.039                              |
|                               | Positive          | 15                                 | 5 (25%)                                   |                                              | 1                                  | 2 (67%)                                  |                                             |
| Varroosis/ DWV                | Negative          | 1269                               | 184 (13%)                                 | Chi <sup>2</sup> = 9.70, df = 1, P = 0.002   | 1276                               | 164 (11 %)                               | Chi <sup>2</sup> = 7.546, df = 1, P = 0.006 |
|                               | Positive          | 58                                 | 20 (26%)                                  |                                              | 63                                 | 18 (22 %)                                |                                             |
