# Supplementary material for: Health status of honey bee colonies (Apis mellifera) and disease-related risk factors for colony losses in Austria
Source: PubMed Central journal article supplement (PMC6615611; doi:10.1371/journal.pone.0219293), 2019-07-09
Supplement: pone.0219293.s011.pdf [file pone.0219293.s011.pdf]

Supporting information: L Morawetz, H Köglberger, A Griesbacher, I Derakhshifar, K Crailsheim, R Brodschneider, R Moosbeckhofer; Health status of honey bee colonies (*Apis mellifera*) and disease-related risk factors for colony losses in Austria

**S11 Table – part 1. Correlation between small size of the colonies and disease symptoms.** The percentage of weak colonies per group (=row) is given in brackets. Each variable is tested with a Chi<sup>2</sup>-Test or a Fisher's Exact Test (FET), respectively. Significant results are shaded in gray.

| Variable                                          | Levels   | Summer visit                       |                                           |                                              | Autumn visit                       |                                          |                                             |
|---------------------------------------------------|----------|------------------------------------|-------------------------------------------|----------------------------------------------|------------------------------------|------------------------------------------|---------------------------------------------|
|                                                   |          | N° colonies rated strong or normal | N° (percentage) colonies rated very small | Statistics                                   | N° colonies rated strong or normal | N° (percentage) colonies rated very weak | Statistics                                  |
| Dead bees in front of the hive                    | Negative | 1301                               | 199 (13 %)                                | FET: P = 0.594                               | 1326                               | 182 (12 %)                               | FET: P = 0.3869                             |
|                                                   | Positive | 26                                 | 5(16 %)                                   |                                              | 13                                 | 0 (0 %)                                  |                                             |
| Bees unable to fly, crawlers in front of the hive | Negative | 1307                               | 203 (13 %)                                | FET: P = 0.344                               | 1332                               | 179 (12 %)                               | FET: P = 0.107                              |
|                                                   | Positive | 20                                 | 1 (5 %)                                   |                                              | 7                                  | 3 (30 %)                                 |                                             |
| Fecal marks                                       | Negative | 1326                               | 203 (13 %)                                | FET: P = 0.249                               | 1336                               | 182 (12 %)                               | FET: P = 1.000                              |
|                                                   | Positive | 1                                  | 1 (50 %)                                  |                                              | 3                                  | 0 (0 %)                                  |                                             |
| Trembling bees                                    | Negative | 1325                               | 204 (13 %)                                | FET: P = 1.000                               | 1338                               | 182 (12 %)                               | FET: P = 1.000                              |
|                                                   | Positive | 2                                  | 0 (0 %)                                   |                                              | 1                                  | 0 (0 %)                                  |                                             |
| Black and shiny bees                              | Negative | 1288                               | 200 (13 %)                                | Chi <sup>2</sup> = 0.313, df = 1, P = 0.576  | 1274                               | 169 (12 %)                               | Chi <sup>2</sup> = 1.286, df = 1, P = 0.257 |
|                                                   | Positive | 39                                 | 4 (9 %)                                   |                                              | 65                                 | 13 (17 %)                                |                                             |
| Rejected bees                                     | Negative | 1320                               | 204 (13 %)                                | FET: P = 0.604                               | 1339                               | 182 (13 %)                               | ---                                         |
|                                                   | Positive | 7                                  | 0 (0 %)                                   |                                              | 0                                  | 0                                        |                                             |
| Thrown out brood                                  | Negative | 1327                               | 204 (13 %)                                | ---                                          | 1338                               | 179 (12 %)                               | FET: P = 0.006                              |
|                                                   | Positive | 0                                  | 0                                         |                                              | 1                                  | 3 (75 %)                                 |                                             |
| Crowded entrance                                  | Negative | 1327                               | 204 (13 %)                                | ---                                          | 1339                               | 182 (13 %)                               | ---                                         |
|                                                   | Positive | 0                                  | 0                                         |                                              | 0                                  | 0                                        |                                             |
| Patchy brood pattern                              | Negative | 1217                               | 170 (12 %)                                | Chi <sup>2</sup> = 13.596, df = 1, P < 0.001 | 1257                               | 160 (11 %)                               | Chi <sup>2</sup> = 8.035, df = 1, P = 0.005 |
|                                                   | Positive | 110                                | 34 (24 %)                                 |                                              | 82                                 | 22 (21 %)                                |                                             |
| Cell cappings punctured                           | Negative | 1313                               | 192 (13 %)                                | FET: P < 0.001                               | 1336                               | 179 (12 %)                               | FET: P = 0.026                              |
|                                                   | Positive | 14                                 | 12 (46 %)                                 |                                              | 3                                  | 3 (50 %)                                 |                                             |

Supporting information: L Morawetz, H Köglberger, A Griesbacher, I Derakhshifar, K Crailsheim, R Brodschneider, R Moosbeckhofer; Health status of honey bee colonies (*Apis mellifera*) and disease-related risk factors for colony losses in Austria

**S11 Table – part 2. Correlation between small size of the colonies and disease symptoms.** The percentage of weak colonies per group (=row) is given in brackets. Each variable is tested with a Chi<sup>2</sup>-Test or a Fisher's Exact Test (FET), respectively. Significant results are shaded in gray.

| Variable                               | Levels                | Summer visit                       |                                           |                                             | Autumn visit                       |                                          |                                              |
|----------------------------------------|-----------------------|------------------------------------|-------------------------------------------|---------------------------------------------|------------------------------------|------------------------------------------|----------------------------------------------|
|                                        |                       | N° colonies rated strong or normal | N° (percentage) colonies rated very small | Statistics                                  | N° colonies rated strong or normal | N° (percentage) colonies rated very weak | Statistics                                   |
| Cell cappings concave / discolored     | Negative              | 1318                               | 198 (13 %)                                | FET: P < 0.01                               | 1338                               | 182 (12 %)                               | FET: P = 1.000                               |
|                                        | Positive              | 9                                  | 6 (40 %)                                  |                                             | 1                                  | 0 (50 %)                                 |                                              |
| Slumped larvae                         | Negative              | 1324                               | 198 (13 %)                                | FET: P < 0.001                              | 1337                               | 182 (12 %)                               | FET: P = 1.000                               |
|                                        | Positive              | 3                                  | 6 (67 %)                                  |                                             | 2                                  | 0 (0 %)                                  |                                              |
| Discolored larvae / pupae              | Negative              | 1325                               | 199 (13 %)                                | FET: P < 0.001                              | 1338                               | 182 (12 %)                               | FET: P = 1.000                               |
|                                        | Positive              | 2                                  | 5 (71 %)                                  |                                             | 1                                  | 0 (0 %)                                  |                                              |
| Dead larvae                            | Negative              | 1316                               | 192 (13 %)                                | FET: P < 0.001                              | 1330                               | 176 (12 %)                               | FET: P = 0.005                               |
|                                        | Positive              | 11                                 | 12 (52 %)                                 |                                             | 9                                  | 6 (40 %)                                 |                                              |
| Glue-like larval remains               | Negative              | 1326                               | 202 (13 %)                                | FET: P = 0.048                              | 1339                               | 182 (12 %)                               | ---                                          |
|                                        | Positive <sup>a</sup> | 1 <sup>a</sup>                     | 2 <sup>a</sup> (67 %)                     |                                             | 0                                  | 0                                        |                                              |
| Scales                                 | Negative              | 1327                               | 203 (13 %)                                | FET: P = 0.133                              | 1339                               | 182 (12 %)                               | ---                                          |
|                                        | Positive <sup>a</sup> | 0                                  | 1 <sup>a</sup> (100 %)                    |                                             | 0                                  | 0                                        |                                              |
| Bees with deformed wings               | Negative              | 1307                               | 193 (13 %)                                | FET: P = 0.001                              | 1310                               | 169 (11 %)                               | Chi <sup>2</sup> = 12.986, df = 1, P < 0.001 |
|                                        | Positive              | 20                                 | 11 (35 %)                                 |                                             | 29                                 | 13 (31 %)                                |                                              |
| Varroa mites on bees                   | Negative              | 1290                               | 191 (13 %)                                | Chi <sup>2</sup> = 6.101, df = 1, P = 0.014 | 1294                               | 173 (12 %)                               | Chi <sup>2</sup> = 0.757, df = 1, P = 0.384  |
|                                        | Positive              | 37                                 | 13 (26 %)                                 |                                             | 45                                 | 9 (17 %)                                 |                                              |
| Varroa mites embedded in cell cappings | Negative              | 1314                               | 202 (13 %)                                | FET: P = 1.000                              | 1335                               | 179 (12 %)                               | FET: P = 0.041                               |
|                                        | Positive              | 13                                 | 2 (13 %)                                  |                                             | 4                                  | 3 (43 %)                                 |                                              |

<sup>a</sup>: confirmed cases of American Foulbrood, all colonies died
