# Supplementary material for: Health status of honey bee colonies (Apis mellifera) and disease-related risk factors for colony losses in Austria
Source: PubMed Central journal article supplement (PMC6615611; doi:10.1371/journal.pone.0219293), 2019-07-09
Supplement: pone.0219293.s012.pdf [file pone.0219293.s012.pdf]

Supporting information: L Morawetz, H Köglberger, A Griesbacher, I Derakhshifar, K Crailsheim, R Brodschneider, R Moosbeckhofer; Health status of honey bee colonies (*Apis mellifera*) and disease-related risk factors for colony losses in Austria

**S12 Table. Prevalence of bee diseases and pests in the study colonies.** 95%CI is given in brackets. Prevalence was evaluated by checking the bee colonies for clinical signs (Table 1). Cases with signs of American Foulbrood, Chronic Bee Paralysis Virus (CBPV) and Nosemosis were confirmed by using standard laboratory tests. Sampling was done in summer 2015 (July, August), autumn 2015 (September, October) and spring 2016 (March-May).

|                        |                    | Apiary level       |                    |                  | Colony level     |                  |                  |
|------------------------|--------------------|--------------------|--------------------|------------------|------------------|------------------|------------------|
|                        |                    | Summer<br>n=189    | Autumn<br>n=188    | Spring<br>n=183  | Summer<br>n=1595 | Autumn<br>n=1544 | Spring<br>n=1401 |
| notifiable disease     | American Foulbrood | 0.5 % (0.1-1.9)    | 0.0 % (0.0-0.0)    | 0.6 % (0.1-1.9)  | 0.2 % (0.1-0.4)  | 0.0 % (0.0-0.0)  | 0.1 % (0.0-0.3)  |
|                        | Small Hive Beetle  | 0.0 % (0.0-0.0)    | 0.0 % (0.0-0.0)    | 0.0 % (0.0-0.0)  | 0.0 % (0.0-0.0)  | 0.0 % (0.0-0.0)  | 0.0 % (0.0-0.0)  |
|                        | Tropilaelaps mite  | 0.0 % (0.0-0.0)    | 0.0 % (0.0-0.0)    | 0.0 % (0.0-0.0)  | 0.0 % (0.0-0.0)  | 0.0 % (0.0-0.0)  | 0.0 % (0.0-0.0)  |
|                        | Varroosis          | 21.2 % (15.7-27.4) | 21.8 % (16.3-28.1) | 7.7 % (4.4-12.1) | 5.2 % (4.2-6.4)  | 5.2 % (4.2-6.4)  | 1.6 % (1.0-2.3)  |
| not notifiable disease | CBPV               | 0.5 % (0.1-1.9)    | 1.1 % (0.3-2.8)    | 0.0 % (0.0-0.0)  | 0.1 % (0.0-0.2)  | 0.1 % (0.0-0.3)  | 0.0 % (0.0-0.0)  |
|                        | European Foulbrood | 0.0 % (0.0-0.0)    | 0.0 % (0.0-0.0)    | 0.0 % (0.0-0.0)  | 0.0 % (0.0-0.0)  | 0.0 % (0.0-0.0)  | 0.0 % (0.0-0.0)  |
|                        | Chalkbrood         | 12.7 % (8.5-18.0)  | 4.3 % (2.0-7.8)    | 8.7 % (5.2-13.4) | 3.6 % (2.8-4.6)  | 0.7 % (0.4-1.2)  | 2.2 % (1.5-3.1)  |
|                        | Nosemosis          | 1.1 % (0.3-2.7)    | 0.0 % (0.0-0.0)    | 1.1 % (0.3-2.8)  | 0.2 % (0.1-0.4)  | 0.0 % (0.0-0.0)  | 0.4 % (0.2-0.7)  |
|                        | Sacbrood           | 6.9 % (3.8-11.1)   | 1.6 % (0.4-4.1)    | 1.6 % (0.4-4.2)  | 1.3 % (0.8-1.9)  | 0.2 % (0.1-0.5)  | 0.2 % (0.1-0.6)  |
