# Supplementary material for: Health status of honey bee colonies (Apis mellifera) and disease-related risk factors for colony losses in Austria
Source: PubMed Central journal article supplement (PMC6615611; doi:10.1371/journal.pone.0219293), 2019-07-09
Supplement: pone.0219293.s013.pdf [file pone.0219293.s013.pdf]

Supporting information: L Morawetz, H Köglberger, A Griesbacher, I Derakhshifar, K Crailsheim, R Brodschneider, R Moosbeckhofer; Health status of honey bee colonies (*Apis mellifera*) and disease-related risk factors for colony losses in Austria

**S13 Table. Winter losses of study colonies, participating apiaries (N=188) and participating operations (N=188).** The losses are calculated for two different definitions of winter loss: (1) dead colonies and (2) dead colonies and living colonies with unsolvable queen problems in spring. 95%CI = 95 % Confidence Interval.

| Sample group         | N° colonies in autumn | N° dead colonies in spring | N° queenless colonies in spring | Winter loss – only dead colonies<br>[Percentage (95%CI)] | Winter loss – dead + queenless colonies<br>[Percentage (95%CI)] |
|----------------------|-----------------------|----------------------------|---------------------------------|----------------------------------------------------------|-----------------------------------------------------------------|
| Beekeeping operation | 12 540                | 659                        | 421                             | 5.3 % (4.1-6.7 %)                                        | 8.6 % (7.5-9.9 %)                                               |
| Sample apiary        | 2 810                 | 211                        | 74                              | 7.5 % (5.8-9.7 %)                                        | 10.1 % (8.3-12.4 %)                                             |
| Sample colonies      | 1 554                 | 131                        | 32                              | 8.4 % (7.1-9.9 %)                                        | 10.5 % (9.0-12.1 %)                                             |
